# Supplementary material for: Acute myeloid leukemia maturation lineage influences residual disease and relapse following differentiation therapy
Source: PubMed Central journal article supplement (PMC8586014; doi:10.1038/s41467-021-26849-w), 2021-11-11
Supplement: 41467_2021_26849_MOESM1_ESM.pdf [file 41467_2021_26849_MOESM1_ESM.pdf]

## SUPPLEMENTARY INFORMATION

### “Acute myeloid leukemia maturation lineage influences residual disease and relapse following differentiation therapy”

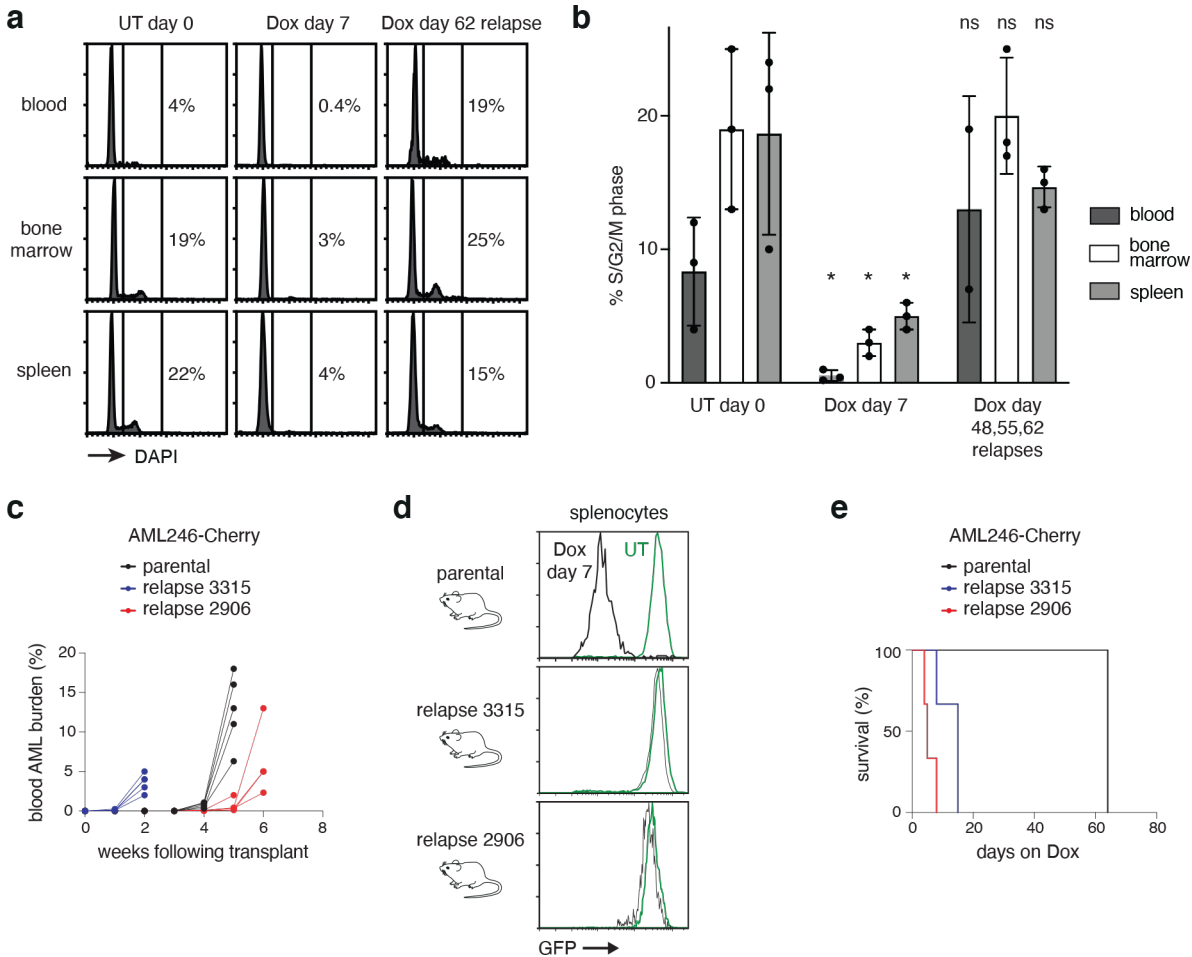

**Supplementary Figure 1. Cell cycle and GFP analysis upon Dox-induced AML246 differentiation and relapse.** (a) DAPI cell cycle analysis indicating the proportion of mCherry<sup>+</sup> cells in S/G2/M phases of the cell cycle in the blood, bone marrow, and spleen of representative untreated, Dox day 7 treated and Dox-treated relapsed mice. (b) Summary of the proportion of AML derived mCherry<sup>+</sup> cells in S/G2/M phase for each organ and time point. Mean  $\pm$  SD, n=3 mice per condition. Relative to untreated p=0.01 for bone marrow, 0.03 for blood and 0.04 for spleen, unpaired two-sided Student’s t-test. (c) Proportion of mCherry<sup>+</sup> AML cells in the peripheral blood of untreated mice re-transplanted with AML cells from relapse mouse 3315 (blue), relapse mouse 2906 (red) or AML246-Cherry parental control cells (black) showing the rate of disease establishment. (d) GFP profile of AML cells in the blood of representative mice from each subgroup at the commencement of Dox treatment (untreated) and after 7 days of Dox treatment. (e) Kaplan-Meier survival analysis of mice from c over 2 months of sustained Dox treatment initiated upon disease establishment at day 0. p=0.017 for relapse 2906 or relapse 3315 versus parental control, Mantel-Cox test. Source data are provided as a Source Data file.

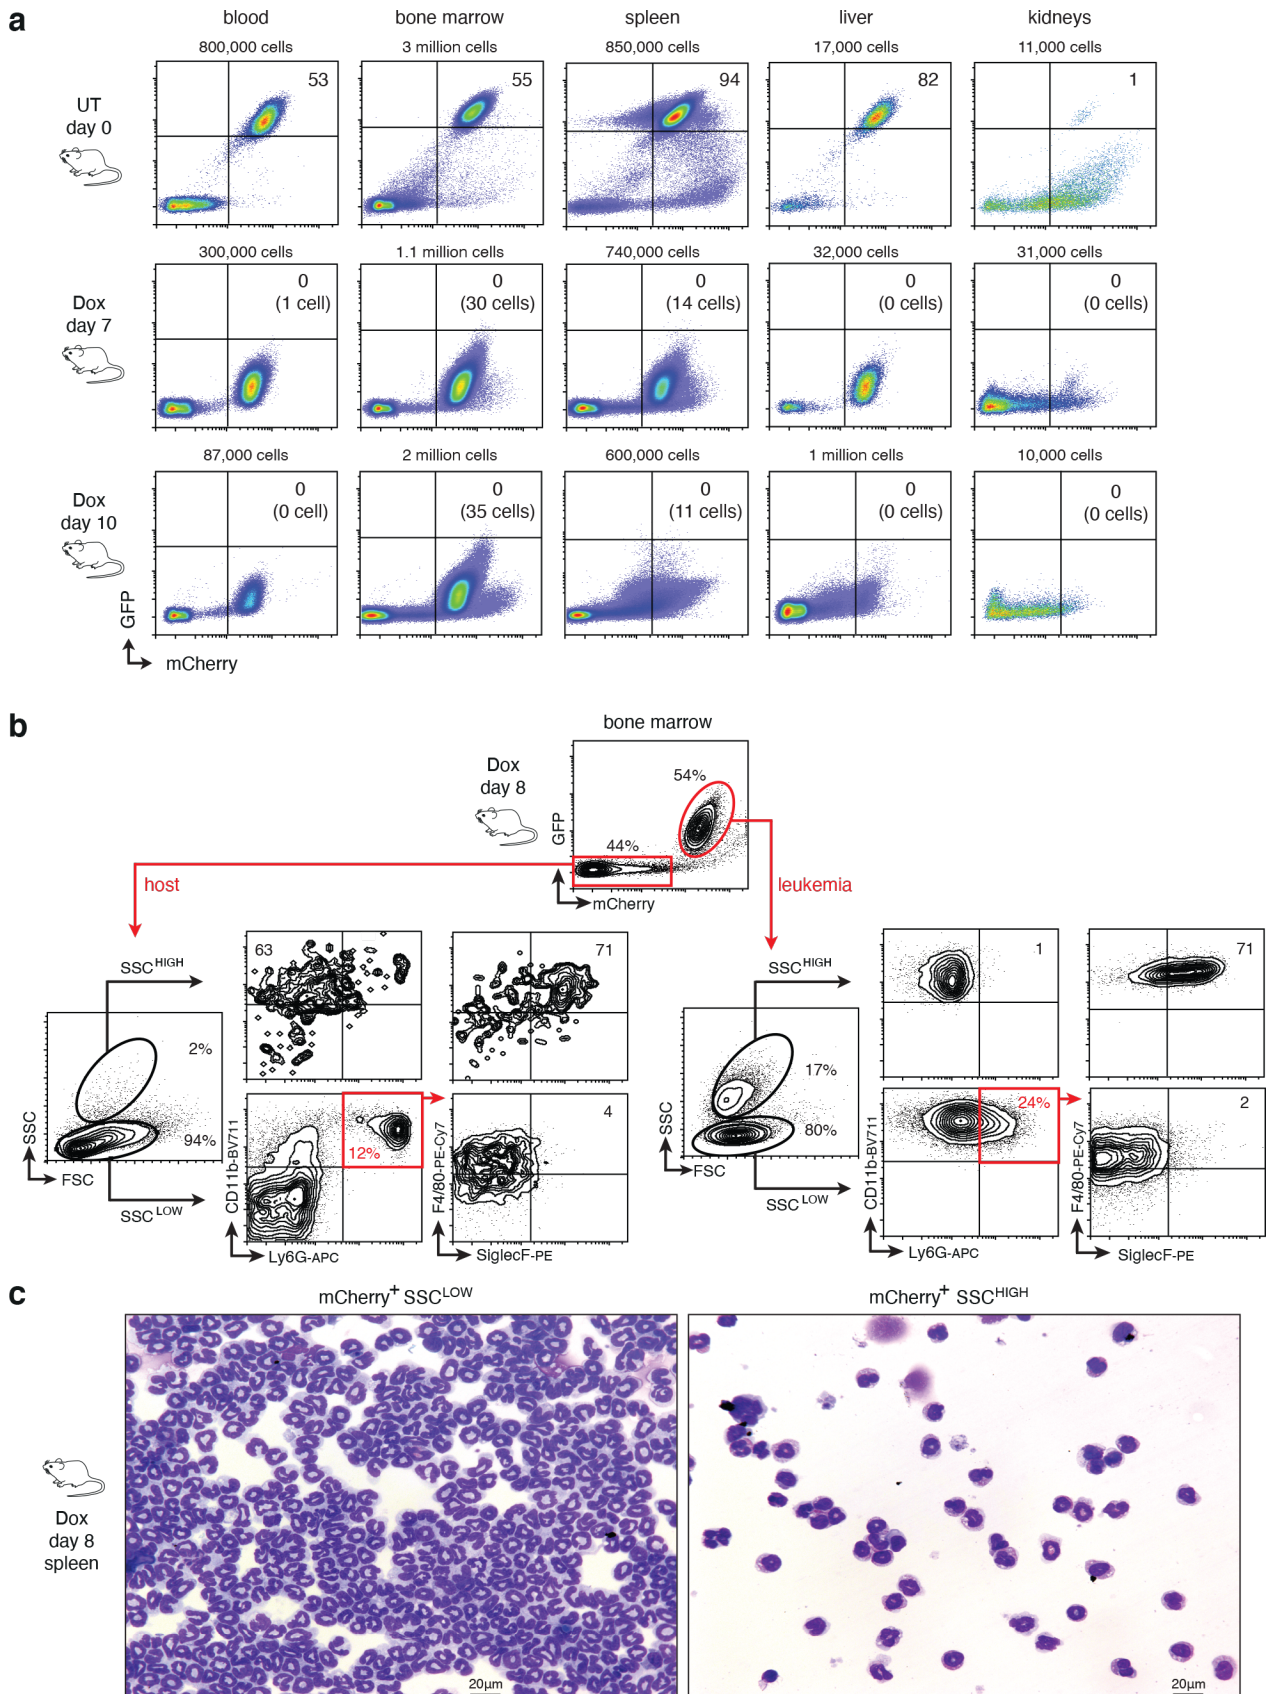

**Supplementary Figure 2. Bifurcated AML differentiation in multiple organs following Dox treatment.** (a) Flow cytometry analysis of mCherry and GFP in the blood, bone marrow, spleen, liver and kidneys of *Rag1*<sup>-/-</sup> mice with established AML246 that were either untreated or Dox treated as indicated. (b) Flow cytometry analysis of the bone marrow of the 8 day Dox treated mouse shown in Fig. 2b, comparing the immunophenotype of AML-derived (mCherry<sup>+</sup>) SSC<sup>LOW</sup>

and SSC<sup>HIGH</sup> populations to host (mCherry<sup>-</sup>) SSC<sup>LOW</sup> and SSC<sup>HIGH</sup> populations containing normal CD11b<sup>+</sup>Ly6G<sup>+</sup> neutrophils and F4/80<sup>HIGH</sup>SiglecF<sup>+</sup> eosinophils respectively. (c) Wide field cytopins of sorted mCherry<sup>+</sup>SSC<sup>LOW</sup> and mCherry<sup>+</sup>SSC<sup>HIGH</sup> cells from the spleen of the 8 day Dox treated mouse shown in Fig. 2b. Data are representative of 2 independent experiments with similar results.

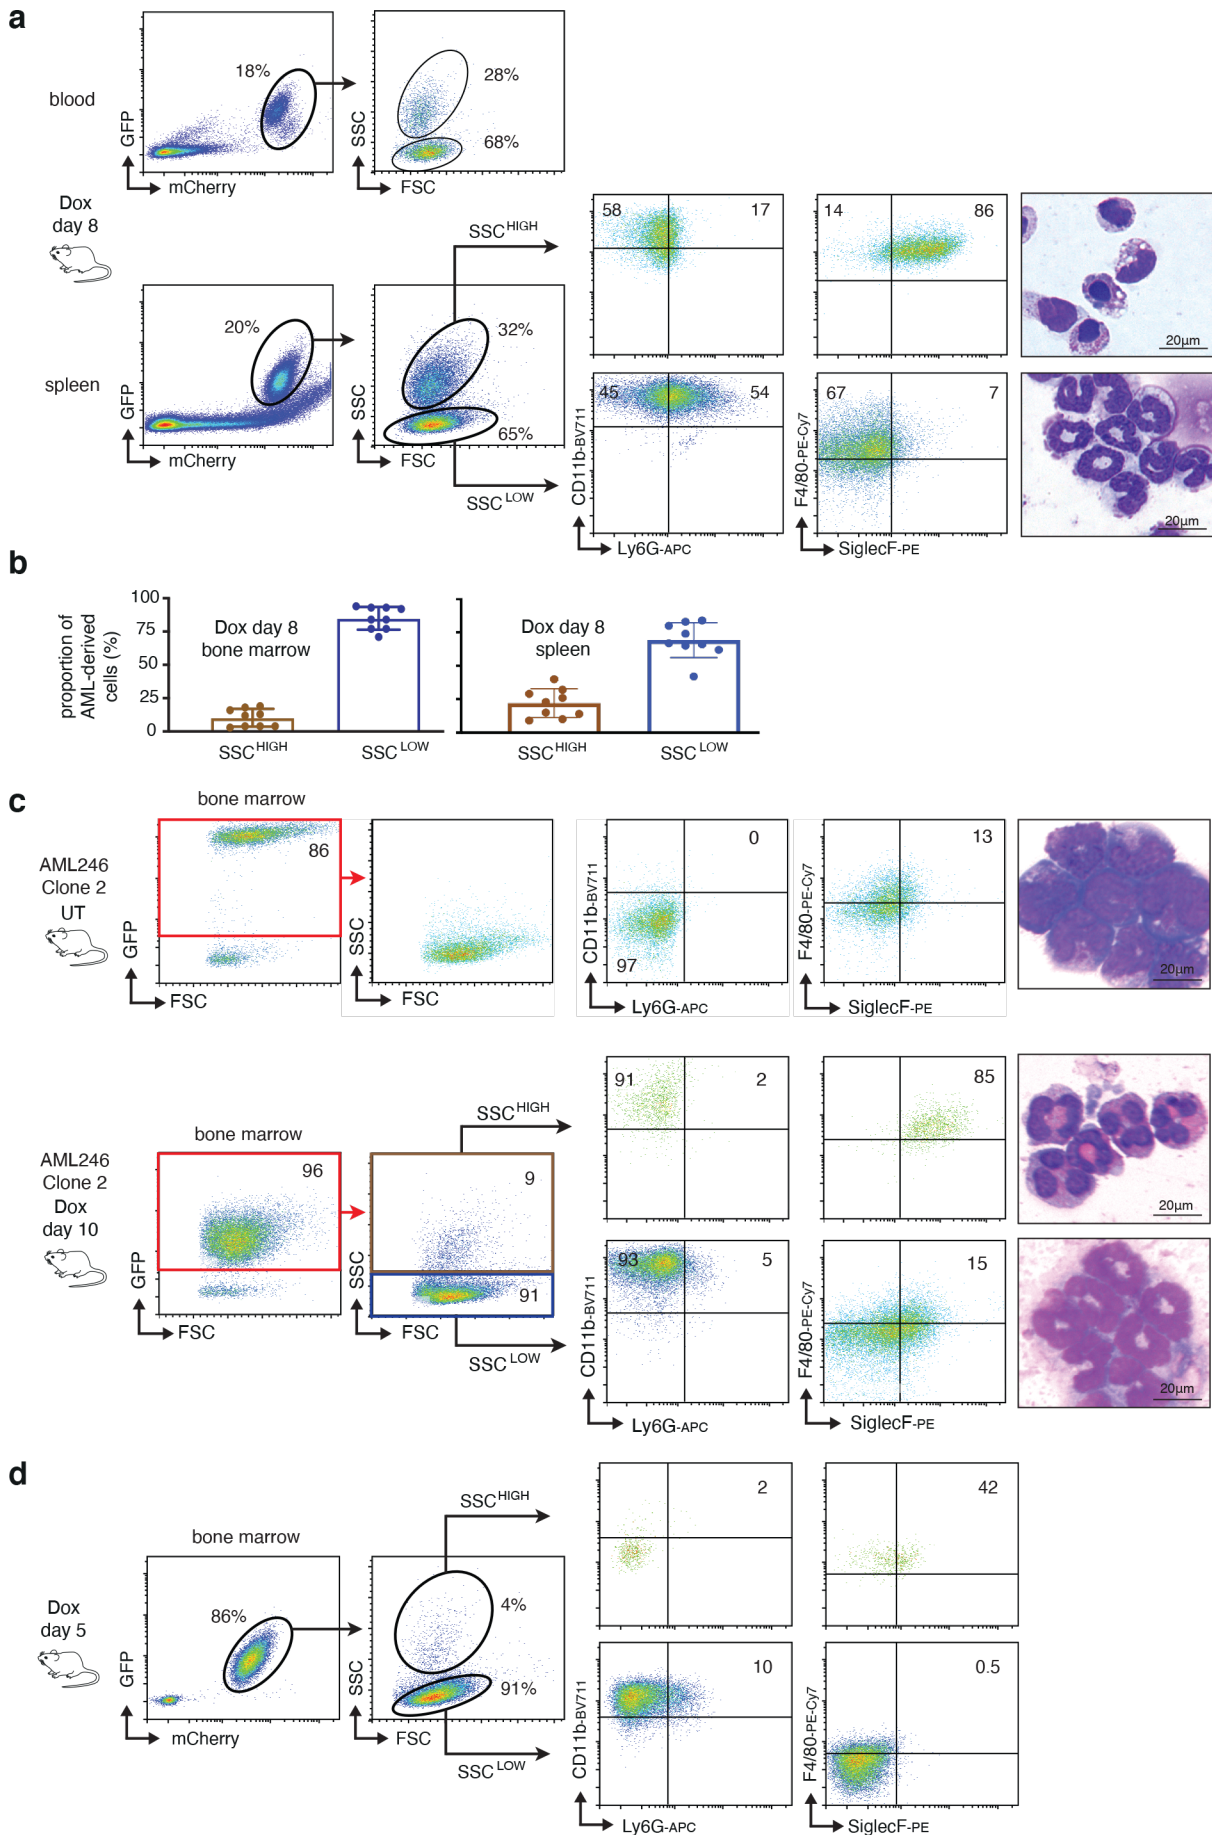

**Supplementary Figure 3. Dox-induced AML246 bifurcation in several *in vivo* contexts. (a)** Flow cytometry analysis of blood and spleen from the 8 day Dox treated mouse shown in Fig. 2b.



Data are representative of 3 independent experiments with similar results. (b) Quantitative analysis showing reproducible AML246 bifurcation in the bone marrow and spleen. Mean  $\pm$  SD, n=9 mice over 3 independent experiments. (c) Analysis of bone marrow from mice transplanted with AML246 Clone 2 (noting that AML246-Cherry was derived from AML246 Clone 1<sup>1</sup>). Data are representative of 2 independent mice with similar results from a single experiment. (d) Flow cytometry analysis of *Rag1*<sup>-/-</sup> mice with established AML246 treated with Dox for 5 days, showing early bifurcation of AML-derived cells into SSC<sup>HIGH</sup> and SSC<sup>LOW</sup> populations.

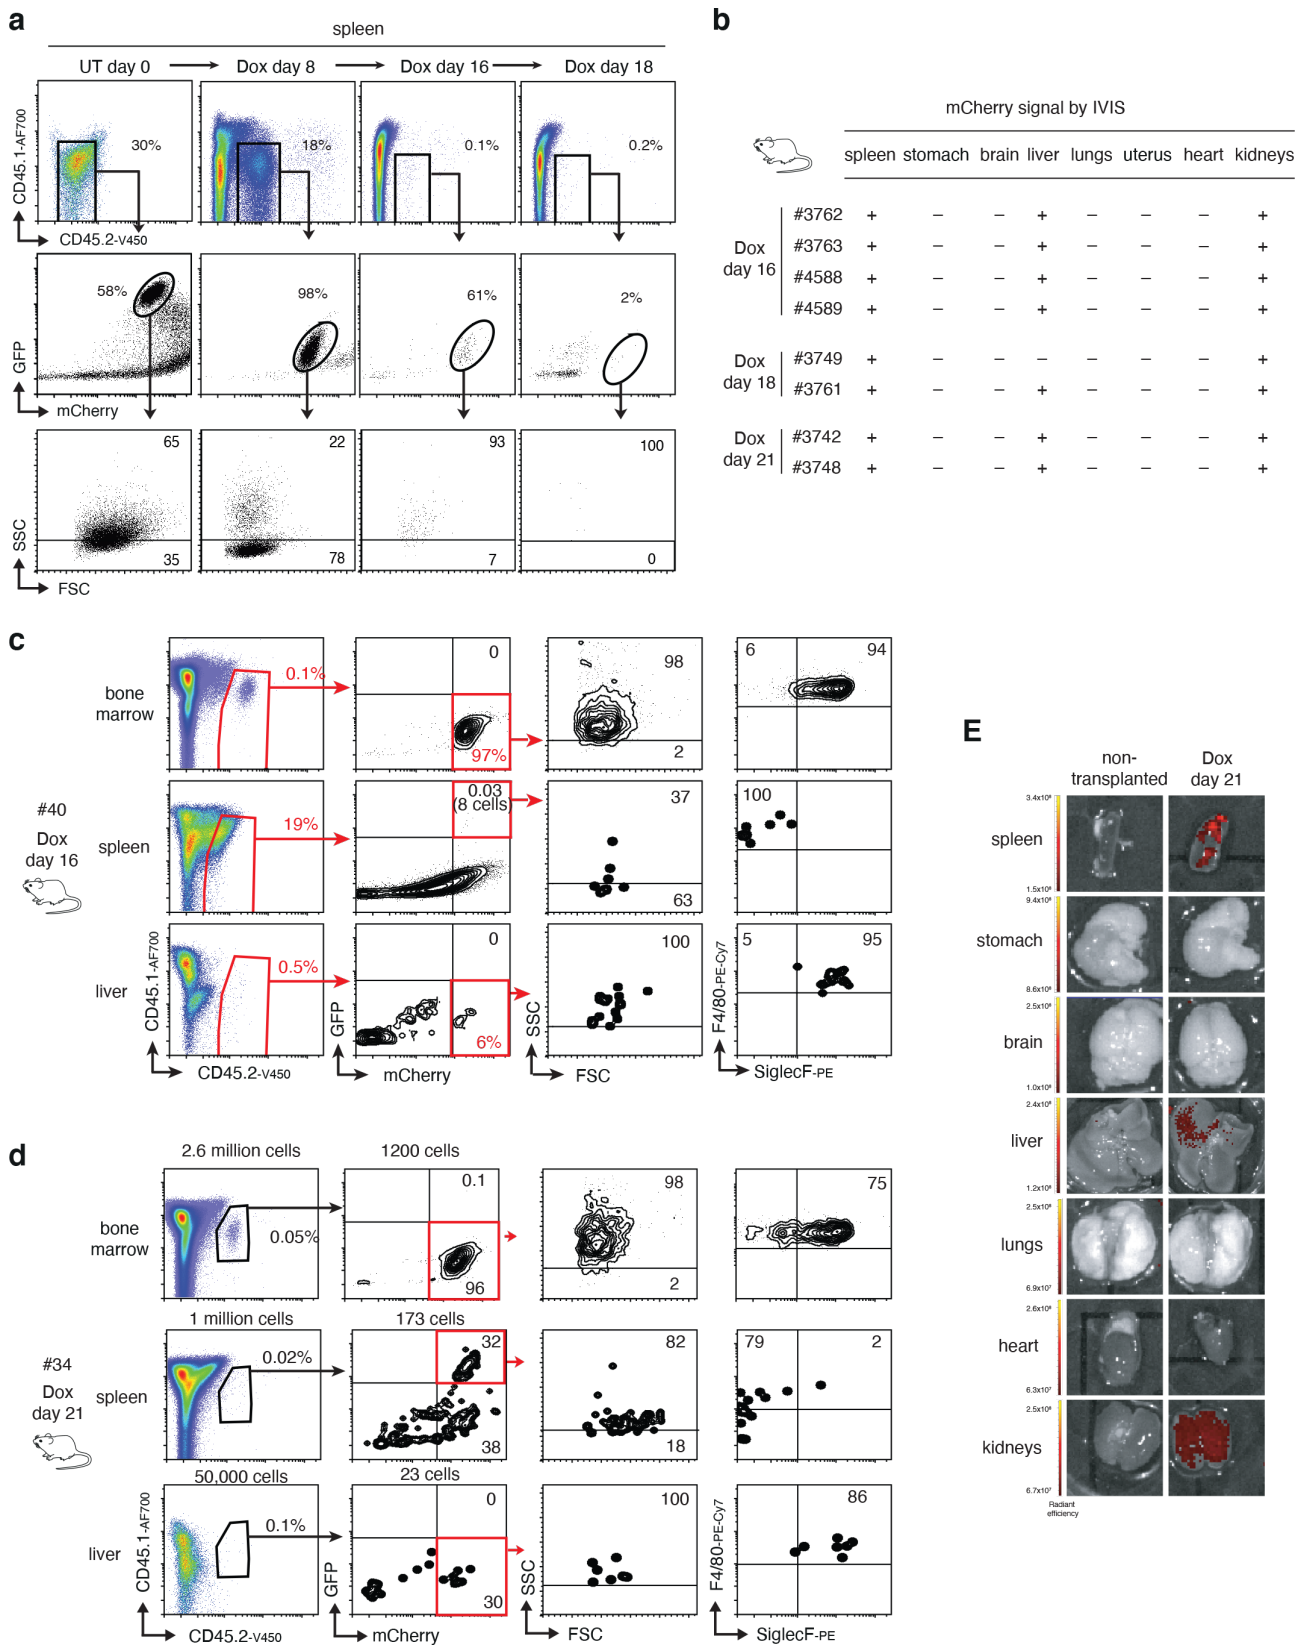

**Supplementary Figure 4. Analysis of 16-21 day Dox treated mice in remission.** (a) FSC/SSC profile of AML-derived cells harvested from the spleen of representative AML246-Cherry leukemic mice during an 18 day Dox treatment time course (same mice shown in Fig. 3a), showing viable AML-derived cells identified based on surface CD45.2 and mCherry. (b) Summary of IVIS organ imaging of 16-21 day Dox treated mice. (c) Flow cytometry analysis of AML-derived cells identified based on surface CD45.2 and mCherry in the bone marrow, spleen, and liver of mouse #40, showing early relapsing mCherry<sup>+</sup>GFP<sup>HIGH</sup>SiglecF<sup>-</sup> cells specifically in the spleen. Note that

bone marrow and liver are gated on mCherry<sup>+</sup>GFP<sup>-</sup> cells, whereas spleen is gated on mCherry<sup>+</sup>GFP<sup>+</sup> early relapse cells. (d) Flow cytometry analysis of bone marrow, liver, and spleen from day 21 Dox treated mouse #34 with AML-derived cells identified based on surface CD45.2 and mCherry. Note that bone marrow and liver are gated on mCherry<sup>+</sup>GFP<sup>-</sup> cells, whereas spleen is gated on mCherry<sup>+</sup>GFP<sup>+</sup> early relapse cells. (e) IVIS mCherry imaging of organs from day 21 Dox treated mouse #3742 where GFP<sup>+</sup>mCherry<sup>+</sup> early relapse cells were detected in the spleen by flow cytometry, showing mCherry signal restricted to the spleen, kidneys and liver. At each time point leukemic mouse organs were imaged alongside matched control organs from a non-transplanted *Rag1*<sup>-/-</sup> mouse for signal calibration.

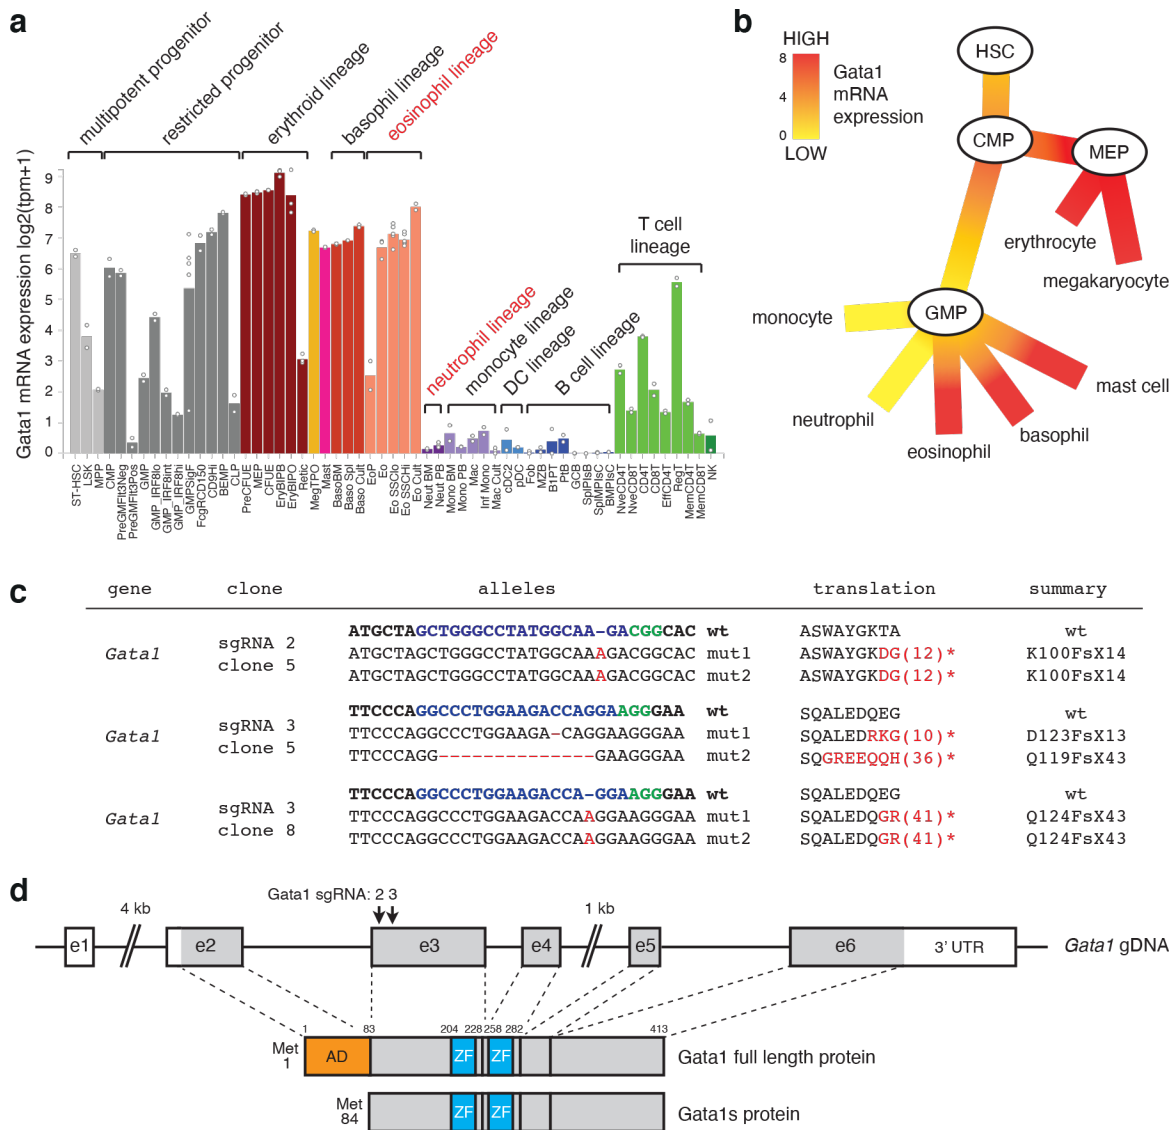

**Supplementary Figure 5. Characterization of *Gata1* knockout AML246-Cherry clones.** (a) Mouse *Gata1* expression across hematopoietic cell types from Haemosphere, associated with the Haemopedia database <sup>2</sup>. (b) Schematic representation of mouse *Gata1* expression across myeloid lineages based on data from a. (c) Sequence analysis of three independent AML246-Cherry *Gata1* KO clones showing biallelic genomic DNA mutations (mut1 and mut2) and their predicted protein products. sgRNA target sites are blue and PAM sequences are green. (d) Schematic of the *Gata1* gene and its encoded full length *Gata1* and *Gata1s* proteins.

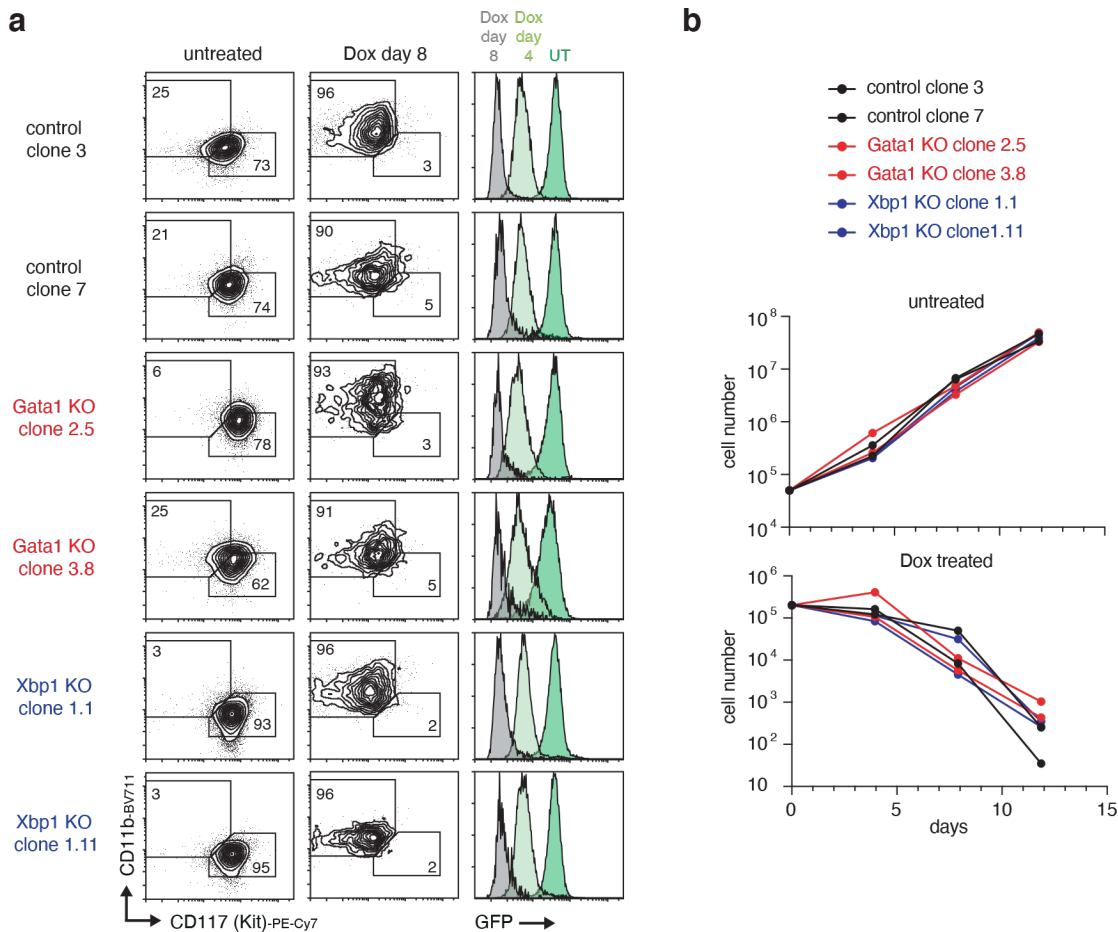

**Supplementary Figure 6. Gata1 and Xbp1 knockout clone analysis *in vitro*.** (a) Flow cytometry analysis of the Dox response of clones in culture, showing similar CD11b induction, CD117 (Kit) repression, and GFP repression for control, Gata1, and Xbp1 knockout AML246 cells. (b) Time course showing proliferation of untreated and Dox-treated clones in culture. Average of 3 technical replicates per clone.



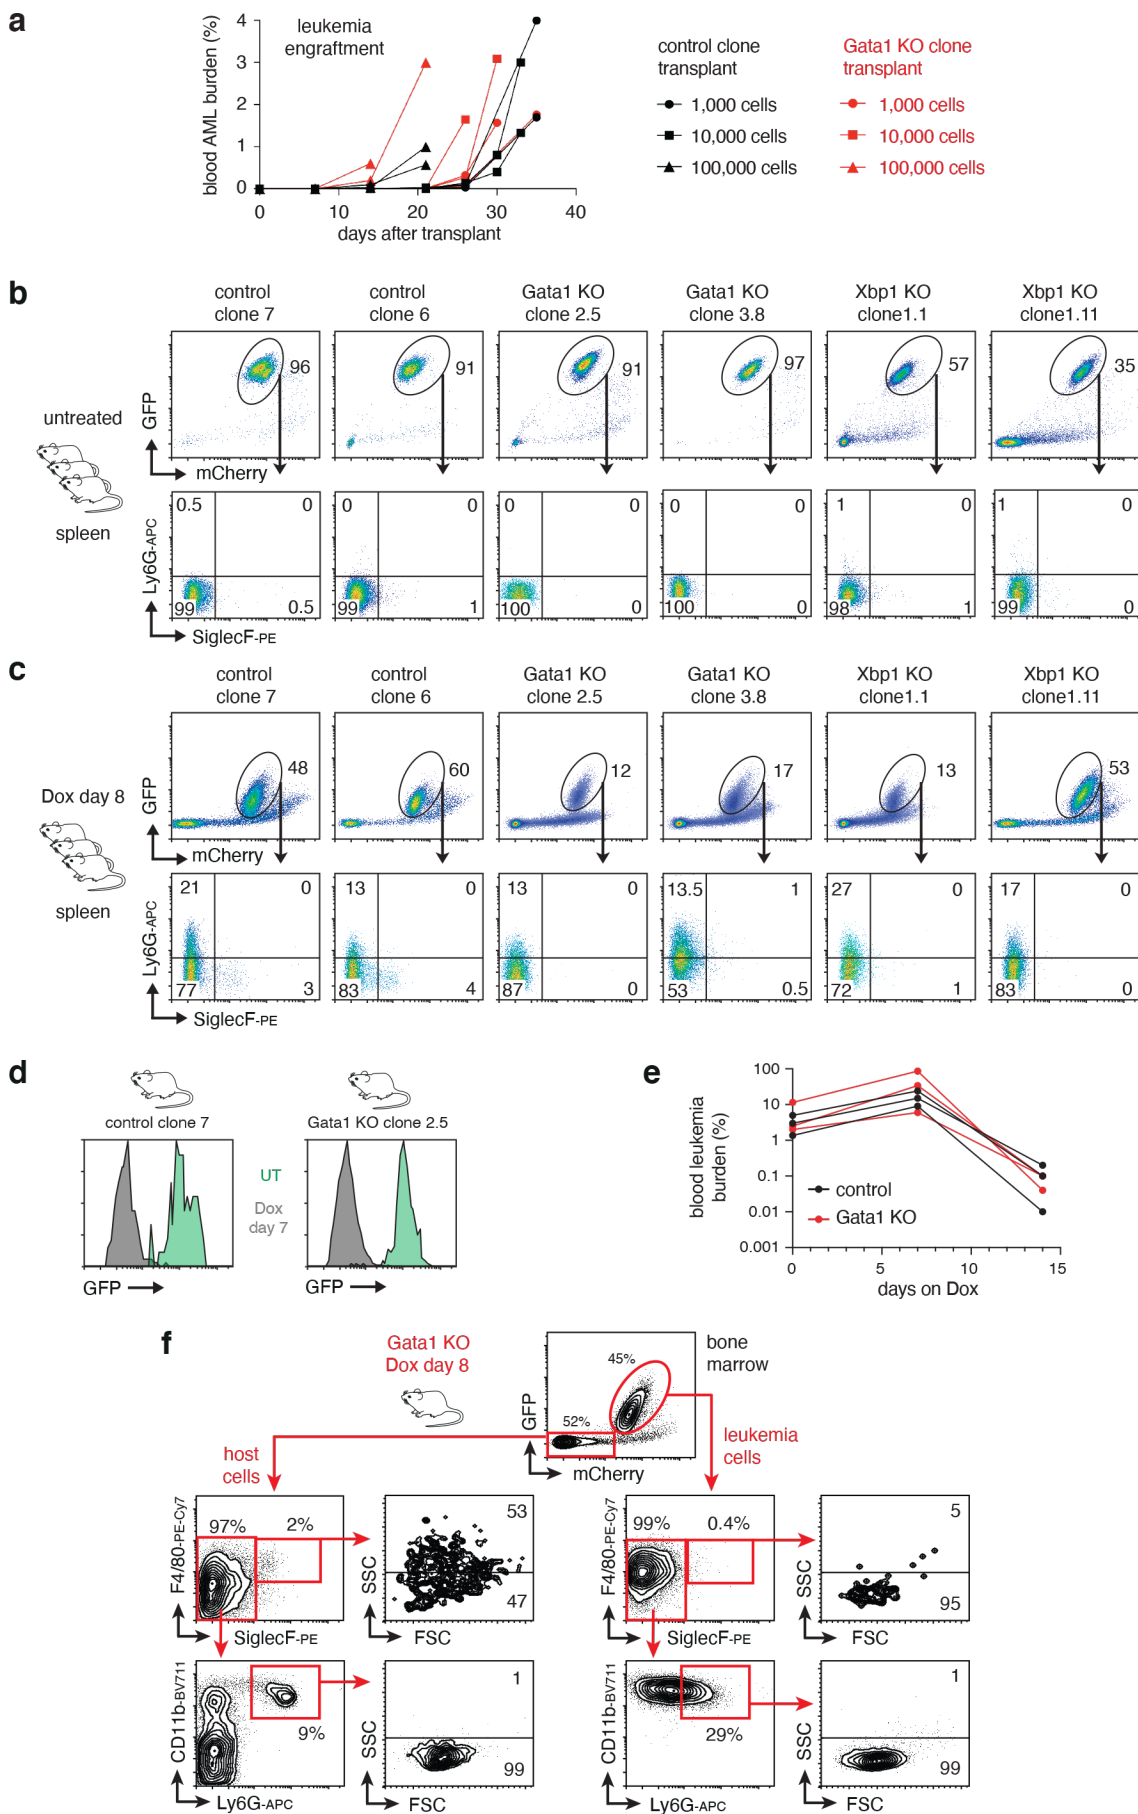

**Supplementary Figure 7. Gata1 and Xbp1 knockout clone analysis *in vivo*.** (a) Blood leukemia burden indicating engraftment following transplant of a dilution series of control and Gata1 knockout AML246 cells as indicated. Two mice were transplanted for each condition. (b-c) Flow

cytometry analysis of splenocytes from mice with established disease following transplant of the indicated control or knockout clones, then either untreated (b) or following 8 days Dox (c). Leukemia gates are indicated in the upper plots. (d) Peripheral blood GFP profile of mice transplanted with the indicated clones and left untreated (UT; green) or Dox treated for 7 days (grey). (e) Leukemia burden in the blood of mice with established disease following transplant of control or Gata1 knockout clones then treated with Dox over a 14 day time course. (F) Flow cytometry analysis of a representative *Rag1*<sup>-/-</sup> mouse with established Gata1 KO AML246-Cherry after 8 days Dox treatment, comparing the immunophenotype of AML-derived (mCherry<sup>+</sup>) populations to host (mCherry<sup>-</sup>) neutrophils (SSC<sup>LOW</sup>Ly6G<sup>+</sup>) and eosinophils (SSC<sup>HIGH</sup>SiglecF<sup>+</sup>).

**a**

| gene        | clone | alleles                                        |       | predicted translation | summary     |
|-------------|-------|------------------------------------------------|-------|-----------------------|-------------|
| <i>Xbp1</i> | 3.1   | <b>ACCAGGAGTTAAGAACACGCTTGGGAATGGACACGCTGG</b> | wt    | QELRTRLGMDTLDP        | wt          |
|             |       | ACCA-----AATGGACACGCTGG                        | mut 1 | QDTLDPDEVPEVEA (227)  | Q124delX241 |
|             |       | ACCAGGA-----ATGGACACGCTGG                      | mut 2 | QEWTRWILTRFQR (7)     | E125FsX19   |
| <i>Xbp1</i> | 3.11  | <b>ACCAGGAGTTAAGAACACGCTTGGGAATGGACACGCTGG</b> |       | QELRTRLGMDTLDP        | wt          |
|             |       | ACCAGGAGTTAAG-----GAATGGACACGCTGG              | mut 1 | QELRNGHAGS-           | R127FsX7    |
|             |       | ACCAGGAGTTAAGAACACGC-----TGG                   | mut 2 | QELRTRWILTRFQR (8)    | R129FsX16   |

**b**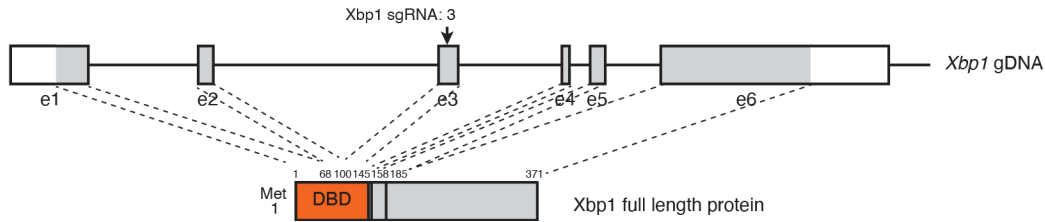

**Supplementary Figure 8. Characterization of Xbp1 knockout AML246-Cherry clones.** (a) Sequence analysis of two independent AML246-Cherry *Xbp1* KO clones showing biallelic (mut1 and mut2) genomic DNA mutations and their predicted protein products. sgRNA target sites are blue and PAM sequences are green. (b) Schematic of the *Xbp1* gene and its encoded protein.

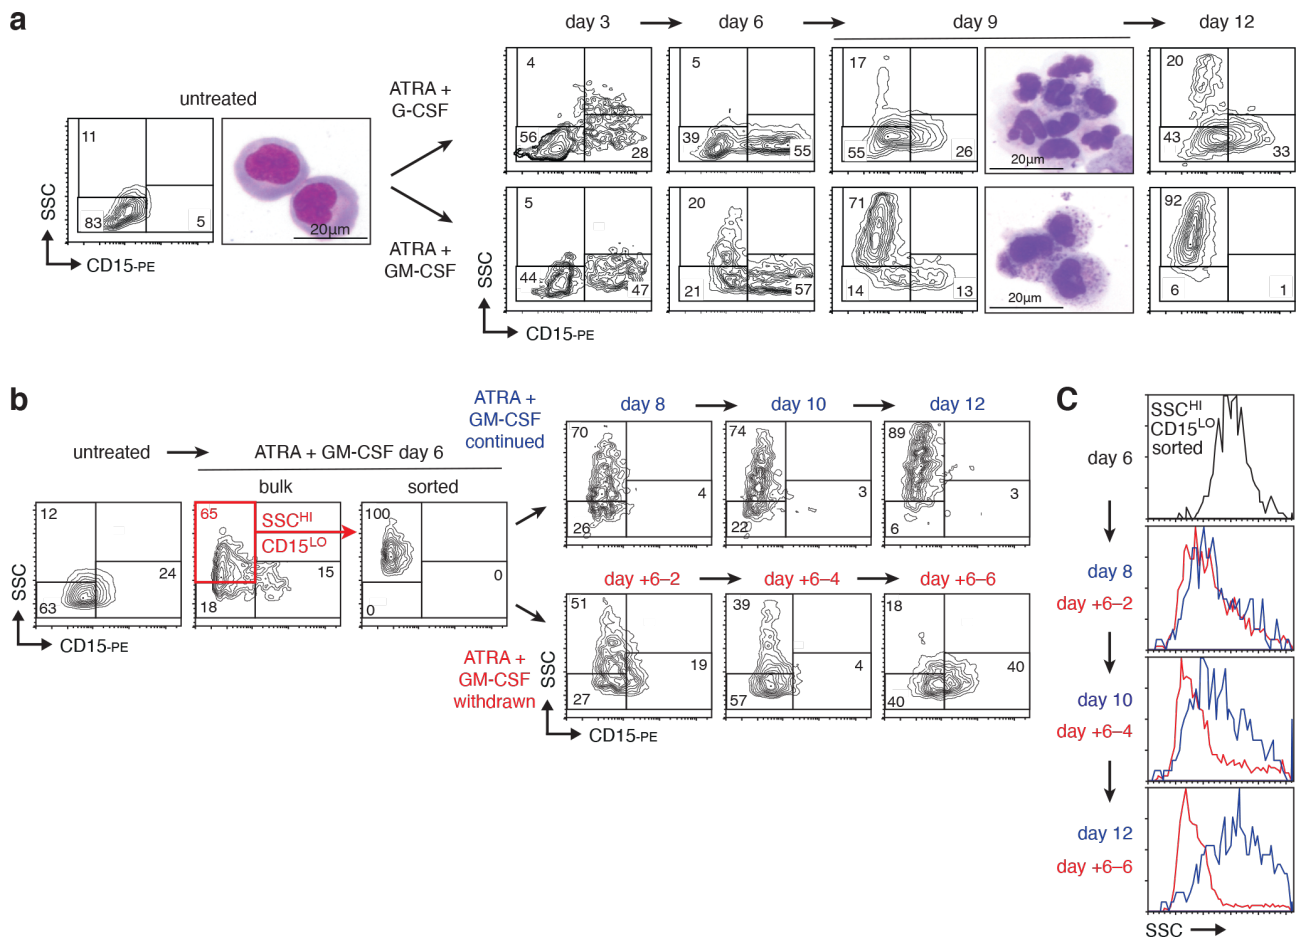

**Supplementary Figure 9. Reversion of mature human HT93-derived eosinophils to an immature proliferative state.** (a) SSC/CD15 profiles (matching the SSC/CD11B profiles in Fig. 8a) of HT93 cells during ATRA treatment combined with G-CSF (upper panels) or GM-CSF (lower panels). Representative cytopspins are shown for untreated (UT) and ATRA day 9 treatments. This experiment was performed once. (b) SSC/CD15 profiles (matching the SSC/CD11B profiles in Fig. 8b) of SSC<sup>HIGH</sup>CD11B<sup>+</sup>CD15<sup>-</sup> cells sorted from ATRA+GM-CSF cultures then either maintained on treatment (upper panels) or following ATRA/GM-CSF withdrawal (lower panels). (c) SSC profile of cells from b, showing progressive return to an immature state following ATRA/GM-CSF withdrawal.

## SUPPLEMENTARY REFERENCES

1. McKenzie MD, *et al.* Interconversion between Tumorigenic and Differentiated States in Acute Myeloid Leukemia. *Cell Stem Cell* **25**, 258-272 e259 (2019).
2. Choi J, *et al.* Haemopedia RNA-seq: a database of gene expression during haematopoiesis in mice and humans. *Nucleic Acids Res* **47**, D780-D785 (2019).

**Supplementary Table 1. Mice transplanted with AML246-Cherry used in this study.**

| mouse ID | Figures                | time point  | mouse ID  | Figures              | time point       |
|----------|------------------------|-------------|-----------|----------------------|------------------|
| 3393     | 1B                     | Dox day -14 | 4588      | 4A, 4B, S4B          | Dox day 16       |
| 77       | 1B                     | UT          | 4589      | 4B,S4B               | Dox day 16       |
| 3391     | 1B, S1B                | Dox day 7   | 39        | 4B,4C                | Dox day 16       |
| 3410     | 1B                     | Dox day 14  | 40        | 4B,4C,S4C            | Dox day 16       |
| 3316     | 1B                     | Dox day 35  | 3749      | 3A,3B,4B,4C,S4A, S4B | Dox day 18       |
| 3315     | 1B-1D, S1B             | relapse     | 3761      | 3B,3D,4A,4B S4B      | Dox day 18       |
| 3341     | 1C, 1D,S1A, S1B        | relapse     | 3742      | 4B,S4B               | Dox day 21       |
| 3158     | 1C, 1D, S1B            | relapse     | 3748      | 4B,S4B               | Dox day 21       |
| 3589     | 1C                     | relapse     | 1 (sn23)  | 4B                   | Dox day 21       |
| 3327     | 1C, 4A                 | relapse     | 2 (sn23)  | 4B                   | Dox day 21       |
| 3302     | 1C                     | relapse     | 5 (sn23)  | 4B                   | Dox day 21       |
| 3324     | 1C                     | relapse     | 45        | 4A,4B                | Dox day 21       |
| 3568     | 1C                     | relapse     | 34        | 4B,S4D               | Dox day 21       |
| 3592     | 1C                     | relapse     | 41        | 4B                   | Dox day 21       |
| 3591     | 1C                     | relapse     | 3404      | S1A, S1B             | UT               |
| 3440     | 1C                     | relapse     | 3501      | S1B                  | UT               |
| 8 (sn25) | 1C                     | relapse     | 3298      | S1B                  | UT               |
| 3584     | 1C                     | relapse     | 3403      | S1A, S1B             | Dox day 7        |
| 3687     | 2B, S2B, S2C, S3A, S3B | Dox day 8   | 3406      | S1B                  | Dox day 7        |
| 4443     | 2C, S2A                | Dox day 10  | 4446      | S1C                  | UT               |
| 82       | 2A                     | UT          | 4444      | S1C                  | Dox day 7        |
| 31       | 2D                     | UT          | 1 (sn25)  | S1C, S1E             | UT and KM        |
| 12       | 2D                     | UT          | 2 (sn25)  | S1C, S1E             | UT and KM        |
| 20       | 2D                     | Dox day 5   | 3 (sn25)  | S1C, S1E             | UT and KM        |
| 23       | 2D                     | Dox day 5   | 4 (sn25)  | S1C, S1D             | UT and Dox day 7 |
| 7        | 3D, 4A                 | Dox day 10  | 5 (sn25)  | S1C,S1D              | UT and KM        |
| 3920     | 3A-3D, 4A              | UT          | 6 (sn25)  | S1C                  | UT               |
| 1        | 3B                     | UT          | 7 (sn25)  | S1C, S1D             | UT and Dox day 7 |
| 3918     | 3B, S4A                | UT          | 8 (sn25)  | S1C, S1E             | UT and KM        |
| 3692     | 3A-3B, S3B,S4A         | Dox day 8   | 9 (sn25)  | S1C, S1D             | UT and Dox day 7 |
| 3693     | 3B, 4A, S3B            | Dox day 8   | 10 (sn25) | S1C, S1E             | UT and KM        |
| 3762     | 3B,S4B                 | Dox day 16  | 11 (sn25) | S1C, S1D             | UT and Dox day 7 |
| 3763     | 3A,3B,4B, S4A,S4B      | Dox day 16  | 12 (sn25) | S1C, S1D             | UT and Dox day 7 |
| 3768     | S3B                    | Dox day 8   | 13 (sn25) | S1C, S1E             | UT and KM        |
| 30       | S3B                    | Dox day 8   | 14 (sn25) | S1C, S1E             | UT and KM        |
| 3784     | S3B                    | Dox day 8   | 15 (sn25) | S1C, S1E             | UT and KM        |
| 3        | S3B                    | Dox day 8   | 4446      | S2A                  | UT               |
| 27       | S3B                    | Dox day 8   | 4444      | S2A                  | Dox day 7        |
| 0        | S3B                    | Dox day 8   |           |                      |                  |
| 4151     | S3C                    | UT          |           |                      |                  |
| 2        | S3C                    | Dox day 10  |           |                      |                  |
| 4        | S3D                    | Dox day 5   |           |                      |                  |



**Supplementary Table 2. Detection of early relapse mCherry+GFP+ cells following 7-14 day Dox treatment.** The number of GFP+ cells per total cells assessed by flow cytometry within each organ is shown. The GFP+ threshold was set using a GFP-HIGH control sample harvested from an untreated mouse on the same day, adjusted so that 96% of these cells were in the GFP+ gate. Dox-treated mice where mCherry+GFP+ cells were part of a GFP continuum at the tail end of the bulk leukemia profile (prevalent at Dox day 7 where bulk GFP repression is incomplete) in at least one of the tissues analyzed are indicated in blue. Dox-treated mice where mCherry+GFP+ cells were a discrete population clearly distinct from the bulk leukemia (prevalent at Dox days 10-14 where the bulk leukemia is GFP-LOW) in at least one of the tissues analyzed are indicated in red.

| <b>Dox day 7</b>  | <b>number of mCherry+GFP+ cells</b> |                    |               |
|-------------------|-------------------------------------|--------------------|---------------|
| <b>mouse ID</b>   | <b>blood</b>                        | <b>bone marrow</b> | <b>spleen</b> |
| 3406              | 0/10,000                            | 0/11,000           | 0/13,000      |
| 3391              | 0/9000                              | 1/11,000           | 0/14,000      |
| 3903              | ND                                  | 1/10,000           | 1/12,000      |
| 3693              | 0/40,000                            | 0/60,000           | 0/210,000     |
| 3692              | 0/21,000                            | 1/51,000           | 1/215,000     |
| 3687              | 0/26,000                            | 0/55,000           | 0/175,000     |
| 10                | 1/11,000                            | 0/10,000           | 0/10,000      |
| 3907              | 0/10,000                            | 15/230,000         | 27/30,000     |
| 3900              | 0/10,000                            | 19/130,000         | 35/200,000    |
| 3899              | 0/11,000                            | 34/220,000         | 18/64,000     |
| 3932              | ND                                  | 0/90,000           | 0/13,000      |
| 3924              | ND                                  | 1/20,000           | 1/16,000      |
| 4444              | 0/200,000                           | 30/1,000,000       | 14/740,000    |
| <b>Dox day 10</b> | <b>number of mCherry+GFP+ cells</b> |                    |               |
| <b>mouse ID</b>   | <b>blood</b>                        | <b>bone marrow</b> | <b>spleen</b> |
| 20                | 0/76,000                            | 2/22,000           | 2/200,000     |
| 3793              | 0/150,000                           | 0/370,000          | 0/150,000     |
| 24                | ND                                  | 1/470,000          | 0/72000       |
| 5                 | 0/15,000                            | 0/350,000          | 0/350,000     |
| 6                 | 0/25,000                            | 0/276,000          | 1/161,000     |
| 4                 | 0/55,000                            | 2/755,000          | 1/150,000     |
| 13                | 0/8,000                             | 1/8,000            | 0/13,000      |
| 18                | 0/8,000                             | 5/9,000            | 0/8,000       |
| 3503              | 0/64,000                            | 0/60,000           | 0/20,000      |
| 3390              | 0/5,000                             | 0/20,000           | 0/40,000      |
| 3380              | 0/8,000                             | 0/11,000           | 0/21,000      |
| 3405              | 0/5,000                             | 0/21,000           | 0/26,000      |
| 4569              | ND                                  | 5/719,000          | 0/132,000     |
| 4443              | 0/130,000                           | 35/2,000,000       | 11/600,000    |
| 4603              | 0/300,000                           | 5/160,000          | 10/3,750,000  |
| <b>Dox day 14</b> | <b>number of mCherry+GFP+ cells</b> |                    |               |
| <b>mouse ID</b>   | <b>blood</b>                        | <b>bone marrow</b> | <b>spleen</b> |
| 3410              | 0/9,000                             | 0/11,000           | 0/17,000      |
| 3289              | 0/11,000                            | 0/5,000            | 1/13,000      |
| 3395              | 0/55,000                            | 0/11,000           | 1/20,000      |
| 3764              | 1/400,000                           | 239/1,000,000      | 60/300,000    |
| 3757              | 0/340,000                           | 20/1,000,000       | 30/500,000    |
| 4567              | 2/23,000                            | 6/1,000,000        | 130/300,000   |
| 4568              | 0/8,000                             | 3/1,000,000        | 170/800,000   |



**Supplementary Table 4. Primer and sgRNA sequences.** All sequences are 5' to 3'.

| Description     | Sequence                                                            |
|-----------------|---------------------------------------------------------------------|
| Control sgRNA   | Forward: caccTAGCGAACGTGTCCGGCG<br>Reverse: aaacCGCCGGACACGTTTCGCTA |
| Gata1 sgRNA 2   | Forward: caccGCTGGGCCTATGGCAAGA<br>Reverse: aaacTCTTGCCATAGGCCAGC   |
| Gata1 sgRNA 3   | Forward: caccGGCCCTGGAAGACCAGGA<br>Reverse: aaacTCTGGTCTTCCAGGGCC   |
| Gata1 gDNA PCR  | Forward: AACTCCGAAGTCACCCAAGCAG<br>Reverse: AGGATGGGAGAACATGGGTT    |
| Gata1 cDNA PCR  | Forward: GTTCAACCCCAGTGTTCCA<br>Reverse: AAGGGGCCAATGGCAGG          |
| Gata1 RT-qPCR   | Forward: GGGATCACCTGAACTCGTC<br>Reverse: GGTTGAACCTGGGCTTGTTG       |
| Rn18s RT-qPCR   | Forward: GTAACCCGTTGAACCCATT<br>Reverse: CCATCCAATCGGTAGTAGCG       |
| SiglecF RT-qPCR | Forward: GGTCTCACAGGTGAAGGTCC<br>Reverse: GGCAAGATGGTTGCCTTTCG      |
| Prg3 RT-qPCR    | Forward: CCCTTGGGTAGTGAGTGCTG<br>Reverse: GTCCAACGCAGCTTCTATGC      |
| Epx RT-qPCR     | Forward: CTGCTTAGCTGTAGTGGGGG<br>Reverse: TGTGAGCACATCAGTGGCAT      |
| Ly6G RT-qPCR    | Forward: AGAGGAAGTTTTATCTGTGCAGCC<br>Reverse:TCAGGTGGGACCCCAATACA   |
| Coro1a RT-qPCR  | Forward: GGGCTGAGTCCCCATTAAG<br>Reverse: GAGACGCGCACATCCTCATA       |
| Spi1 RT-qPCR    | Forward: CTGGAGCTCAGCTGGATGTTAC<br>Reverse: GCCATCAGCTTCTCCATCAGA   |
| Xbp1 sgRNA 3    | Forward: caccGGAGTTAAGAACACGCTT<br>Reverse: aaacAAGCGTGTTCTTAACTCC  |
| Xbp1 gDNA PCR   | Forward: CTCTGTCCCATTAGCCACCG<br>Reverse:TGAATTTTCCTGTTTCCTTGA      |

| Supplementary Table 5. shRNA oligonucleotide sequences. All sequences are 5' to 3'. |                                                                                                                                               |
|-------------------------------------------------------------------------------------|-----------------------------------------------------------------------------------------------------------------------------------------------|
| shRNA                                                                               | Oligonucleotide sequence                                                                                                                      |
| Renilla.713                                                                         | Forward:<br>TCGAGAAGGTATATTGCTGTTGACAGTGAGCGCAGGAATTATAATGCTTATCTATAGTGAAGC<br>CACAGATGTATAGATAAGCATTATAATTCCTATGCCTACTGCCTCGGACTTCAAGGGGCTAG |
|                                                                                     | Reverse:<br>AATTCTAGCCCCTTGAAGTCCGAGGCAGTAGGCATAGGAATTATAATGCTTATCTATACATCTGT<br>GGCTTCACTATAGATAAGCATTATAATTCCTGCGCTCACTGTCAACAGCAATATACCTTC |
| Gata1.1377                                                                          | Forward:<br>TCGAGAAGGTATATTGCTGTTGACAGTGAGCGCCTGTAGCTATGTAGCTATGAATAGTGAAGC<br>CACAGATGTATTCATAGCTACATAGCTACAGATGCCTACTGCCTCGGACTTCAAGGGGCTAG |
|                                                                                     | Reverse:<br>AATTCTAGCCCCTTGAAGTCCGAGGCAGTAGGCATCTGTAGCTATGTAGCTATGAATACATCTG<br>TGGCTTCACTATTCATAGCTACATAGCTACAGGCGCTCACTGTCAACAGCAATATACCTTC |
| Gata1.1388                                                                          | Forward:<br>TCGAGAAGGTATATTGCTGTTGACAGTGAGCGATAGCTATGAACTATGTAGATATAGTGAAGC<br>CACAGATGTATATCTACATAGTTCATAGCTACTGCCTACTGCCTCGGACTTCAAGGGGCTAG |
|                                                                                     | Reverse:<br>AATTCTAGCCCCTTGAAGTCCGAGGCAGTAGGCAGTAGCTATGAACTATGTAGATATACATCTG<br>TGGCTTCACTATATCTACATAGTTCATAGCTATCGCTCACTGTCAACAGCAATATACCTTC |
